# Supplementary material for: Construction of Oxygen-Rich Carbon Foams for Rapid Carbon Dioxide Capture
Source: MDPI journal article supplement (doi:10.3390/ma14010173), 2020-12-31
Supplement: s1 [file s1]

# Construction of Oxygen-Rich Carbon Foams for Rapid Carbon Dioxide Capture

Cheng Duan <sup>1,2</sup>, Wei Zou <sup>1</sup>, Zhongjie Du <sup>1</sup>, Jianguo Mi <sup>2</sup>, Jiayi Han <sup>3</sup>, and Chen Zhang <sup>1,\*</sup>

<sup>1</sup> Key Laboratory of Carbon Fiber and Functional Polymers, Ministry of Education, College of Materials Science and Engineering, Beijing University of Chemical Technology, Beijing 100029, China

<sup>2</sup> State Key Laboratory of Organic-Inorganic Composites, Beijing University of Chemical Technology, Beijing 100029, China

<sup>3</sup> Huanqiu Contracting & engineering Co., Ltd. Huanqiu Corporation, Beijing 100029, China

\* Correspondence: zhangch@mail.buct.edu.cn

**Table S1.** Formula of PRFs and ACRFs.

| Sample           | Water Added in Continuous Phase | Concentration of Continuous Phase | Toluene | Volume of Dispersed Phase | Carbonized Temperature |
|------------------|---------------------------------|-----------------------------------|---------|---------------------------|------------------------|
| PRF-50C-80%,     | 1.36 g                          | 50 wt%                            | 20 ml   | 80 vol%                   | -                      |
| PRF-50C-85%,     | 1.36 g                          | 50 wt%                            | 28.5 ml | 85 vol%                   | -                      |
| PRF-50C-90%,     | 1.36 g                          | 50 wt%                            | 45 ml   | 90 vol%                   | -                      |
| PRF-40C-85%,     | 3.06 g                          | 40 wt%                            | 28.5 ml | 85 vol%                   | -                      |
| PRF-30C-85%,     | 5.89 g                          | 30 wt%                            | 28.5 ml | 85 vol%                   | -                      |
| ACRF-50C-80%-800 | 1.36 g                          | 50 wt%                            | 20 ml   | 80 vol%                   | 800°C                  |
| ACRF-50C-85%-800 | 1.36 g                          | 50 wt%                            | 28.5 ml | 85 vol%                   | 800°C                  |
| ACRF-50C-90%-800 | 1.36 g                          | 50 wt%                            | 45 ml   | 90 vol%                   | 800°C                  |
| ACRF-50C-85%-700 | 1.36 g                          | 50 wt%                            | 28.5 ml | 85 vol%                   | 700°C                  |
| ACRF-50C-85%-600 | 1.36 g                          | 50 wt%                            | 28.5 ml | 85 vol%                   | 600°C                  |
| ACRF-40C-85%-800 | 3.06 g                          | 40 wt%                            | 28.5 ml | 85 vol%                   | 800°C                  |
| ACRF-30C-85%-800 | 5.89 g                          | 30 wt%                            | 28.5 ml | 85 vol%                   | 800°C                  |

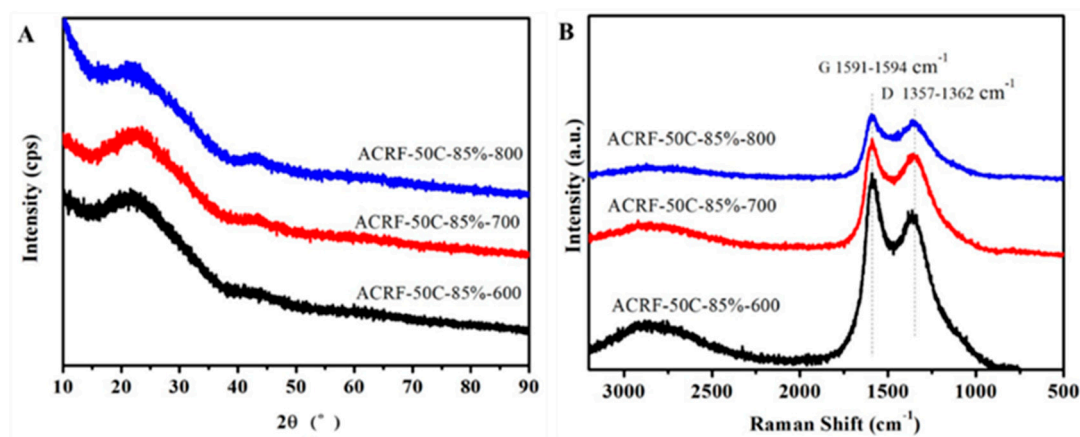

**Figure S1.** XRD patterns (A) and Raman spectra (B) of ACRFs prepared at different carbonization temperatures.

In Figure S1, the XRD patterns of ACRF-50C-85%-600, ACRF-50C-85%-700, and ACRF-50C-85%-800 showed similar diffraction patterns with broad bands at  $2\theta = 23^\circ$  and weak bands at  $2\theta = 43^\circ$ , which corresponded to (002) and (100) diffraction planes of graphitic carbon, respectively. It is revealed that the graphitization degree in these ACRFs were low [1,2]. Furthermore, the Raman spectra were measured and shown in Figure 6B. The G band ( $1591\text{--}1594\text{ cm}^{-1}$ ) was associated with the stretch modes of  $\text{sp}^2$ -bonded C, which represented the graphitic domains in the materials, and

\* Corresponding author, Email: zhangch@mail.buct.edu.cn

the D band ( $1357\text{--}1362\text{ cm}^{-1}$ ) was attributed to the breathing mode of k-point phonons  $A_{1g}$  symmetry, which represented disordered and defective domains of graphite [3]. The intensity ratios of D band to G band were 0.86 (ACRF-50C-85%-600), 0.89 (ACRF-50C-85%-700), and 0.91 (ACRF-50C-85%-800), respectively. It could be known that the ratio of disordered and defective domains in carbon foam increased as the carbonized temperature increasing.

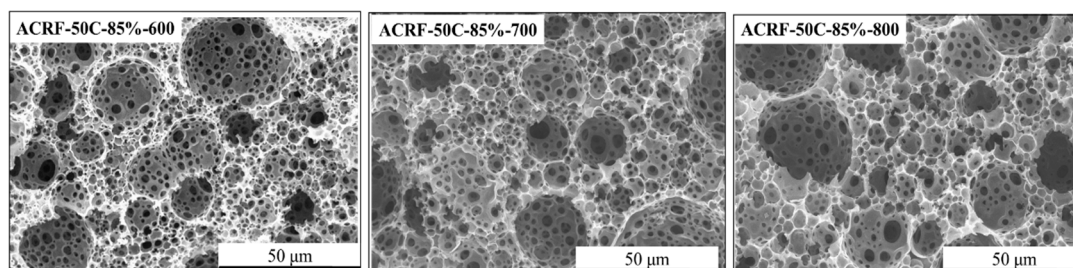

**Figure S2.** SEM images of carbon foams prepared at different carbonizing temperatures.

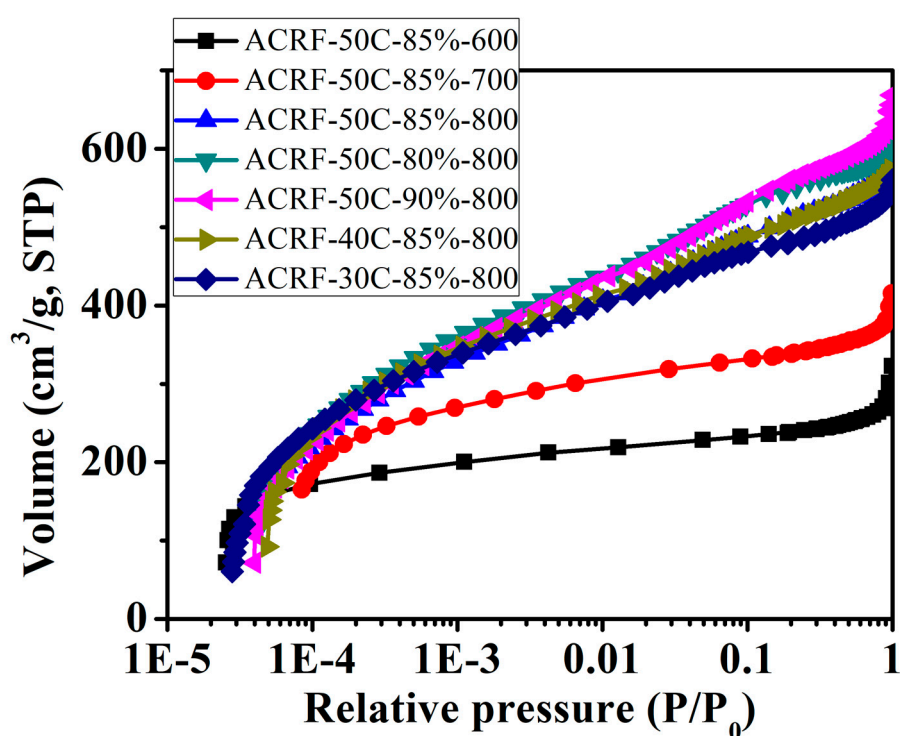

**Figure S3.**  $N_2$  adsorption-desorption isotherms of ACRFs at 77 K at low relative pressure.

**Table S2.** Oxygen element content at different chemical state in the carbon foams obtained from curve fitting of the O 1s spectra.

| Carbon Foam      | Total O Content wt% | C=O Content wt% | C-O Content wt% | -COO Content wt% |
|------------------|---------------------|-----------------|-----------------|------------------|
| ACRF-50C-85%-600 | 18.7                | 6.40            | 5.98            | 6.32             |
| ACRF-50C-85%-700 | 18.0                | 6.41            | 5.09            | 6.50             |
| ACRF-50C-85%-800 | 14.6                | 1.33            | 7.40            | 5.87             |

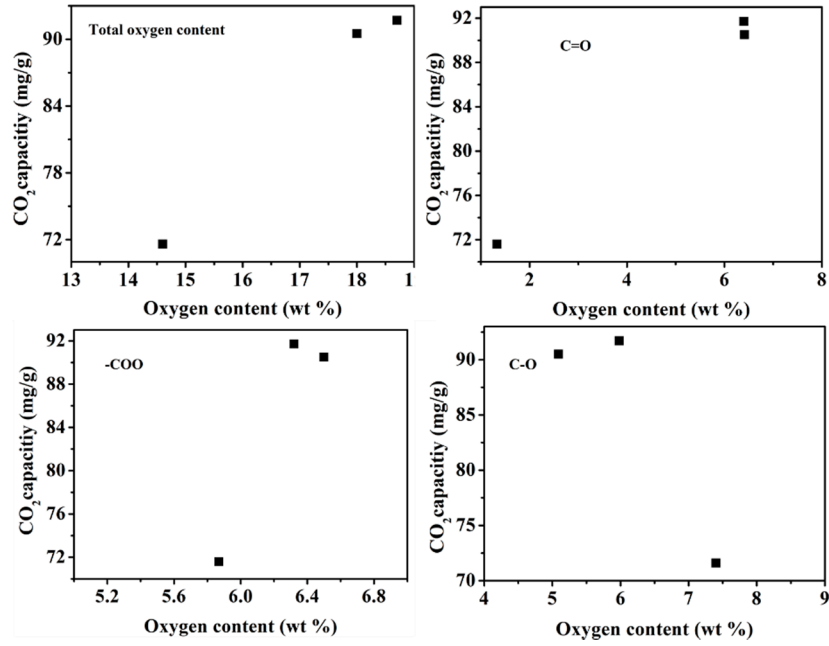

**Figure S4.** Relationships between CO<sub>2</sub> capacities (at 15 kPa) of ACRFs and the content of oxygen in different chemical state.

From Figure S4, it could be found that there was some relationship between CO<sub>2</sub> capacities at 15 kPa and total oxygen content, but it is hard to tell the effect of different oxygen content groups on CO<sub>2</sub> capacities.

**Table S3.** Summary of BET specific surface area and CO<sub>2</sub> capture performance comparison of various solid physical adsorbent.

| Sample          | Source                                 | S <sub>BET</sub> (m <sup>2</sup> g <sup>-1</sup> ) | CO <sub>2</sub> (mg g <sup>-1</sup> )<br>1 Bar, 273K | S <sub>CO2</sub> /S <sub>N2</sub><br>(IAST) | Ref.      |
|-----------------|----------------------------------------|----------------------------------------------------|------------------------------------------------------|---------------------------------------------|-----------|
| ACRF-40c-85-800 | porous resorcinol-formaldehyde resin   | 1944                                               | 271                                                  | 17.6 <sup>a</sup>                           | This work |
| PC-2-3          | Biomass tar                            | 1829                                               | 221                                                  | 19.7 <sup>a</sup>                           | [4]       |
| NPC-4-600       | triazine-based porous organic polymers | 1518                                               | 207                                                  | 34.5 <sup>a</sup>                           | [5]       |
| FC4             | polyimide                              | 941                                                | 178                                                  | 14.2 <sup>b</sup>                           | [6]       |
| PS-450-2        | petroleum coke                         | 1666                                               | 261                                                  | 17 <sup>b</sup>                             | [7]       |
| NAC-450-1.5     | walnut shell                           | 1687                                               | 230                                                  | 24.67 <sup>b</sup>                          | [8]       |

<sup>a</sup> Measured at 273 K; <sup>b</sup> Measured at 298 K.

Micropore diffusion model:

$$\frac{q_t}{q_e} = \frac{6}{\sqrt{\pi}} \sqrt{\frac{D_c}{r_c^2}} - \frac{3D_c t}{r_c^2} \quad \text{Equation S(1)}$$

where  $D_c$  is the micropore diffusion parameter (cm<sup>2</sup>/s) and  $r_c$  is the particle diameter of the adsorbent (s)

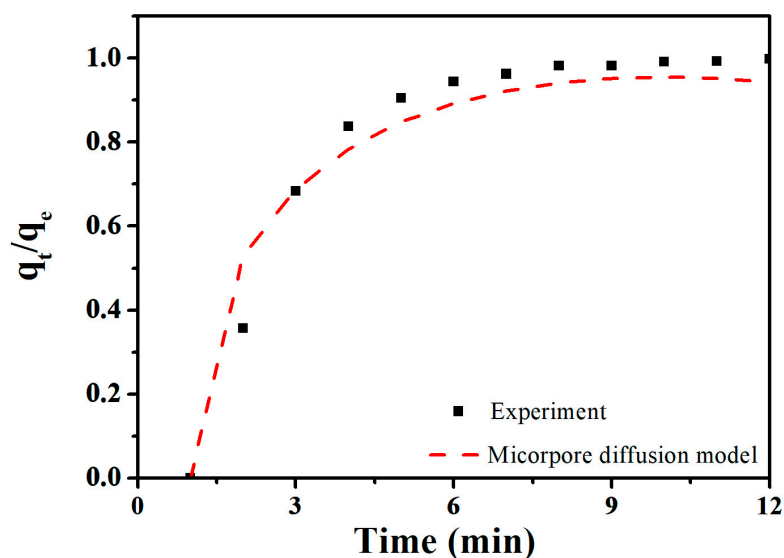

Figure S5. CO<sub>2</sub> adsorption kinetics of ACRF-40C-85%-800 fitted by micropore diffusion model.

Table S4. Parameters of micropore diffusion model for CO<sub>2</sub> adsorption.

| Sample           | Micropore Diffusion Parameter |       |
|------------------|-------------------------------|-------|
|                  | $D_c$ (cm <sup>2</sup> /s)    | 0.238 |
| ACRF-40C-85%-800 | $r_c$ (cm)                    | 2.60  |
|                  | $R^2$                         | 0.971 |

#### Reference:

- Goel, C.; Bhunia, H.; Bajpai, P.K. Resorcinol–formaldehyde based nanostructured carbons for CO<sub>2</sub> adsorption: Kinetics, isotherm and thermodynamic studies. *RSC Adv.*, **2015**, *5*, 93563–93578.
- Han, J.; Xu, G.; Dou, H.; MacFarlane, D.R. Porous Nitrogen-Doped Carbon Microspheres Derived from Microporous Polymeric Organic Frameworks for High Performance Electric Double-Layer Capacitors. *Chem. Eur. J.* **2015**, *21*, 2310–2314.
- Lee, J.-S.M.; Briggs, M.E.; Hasell, T.; Cooper, A.I. Hyperporous carbons from hypercrosslinked polymers. *Adv. Mater.* **2016**, *28*, 9804–9810.
- Yuan, H.; Chen, J.; Li, D.; Chen, H.; Chen, Y. 5 Ultramicropore-rich renewable porous carbon from biomass tar with excellent adsorption capacity and selectivity for CO<sub>2</sub> capture. *Chem. Eng. J.* **2019**, *373*, 171–178.
- Shao, L.; Li, Y.; Huang, J.; Liu, Y.N. Synthesis of triazine-based porous organic polymers derived N-enriched porous carbons for CO<sub>2</sub> capture. *Ind. Eng. Chem. Res.* **2018**, *57*, 2856–2865.
- Chen, C.; Huang, H.; Yu, Y.; Shi, J.; He, C.; Albilali, R.; Pan, H. Template-free synthesis of hierarchical porous carbon with controlled morphology for CO<sub>2</sub> efficient capture. *Chem. Eng. J.* **2018**, *353*, 584–594.
- Rao, L.; Liu, S.; Chen, J.; Wang, L.; An, L.; Yang, P.; Hu, X. Single-step synthesis of nitrogen-doped porous carbons for CO<sub>2</sub> capture by low-temperature sodium amide activation of petroleum coke. *Energy Fuels* **2018**, *32*, 12787–12794.
- Yang, Z.; Zhang, G.; Xu, Y.; Zhao, P. One step N-doping and activation of biomass carbon at low temperature through NaNH<sub>2</sub>: An effective approach to CO<sub>2</sub> adsorbents. *J. CO<sub>2</sub> Util.* **2019**, *33*, 320–329.
